# Supplementary material
Source: Springer Nature journal article supplement (https://springermedizin.de/resource/supplementary/12984_2011_326_MOESM2_ESM.pdf/9605790)

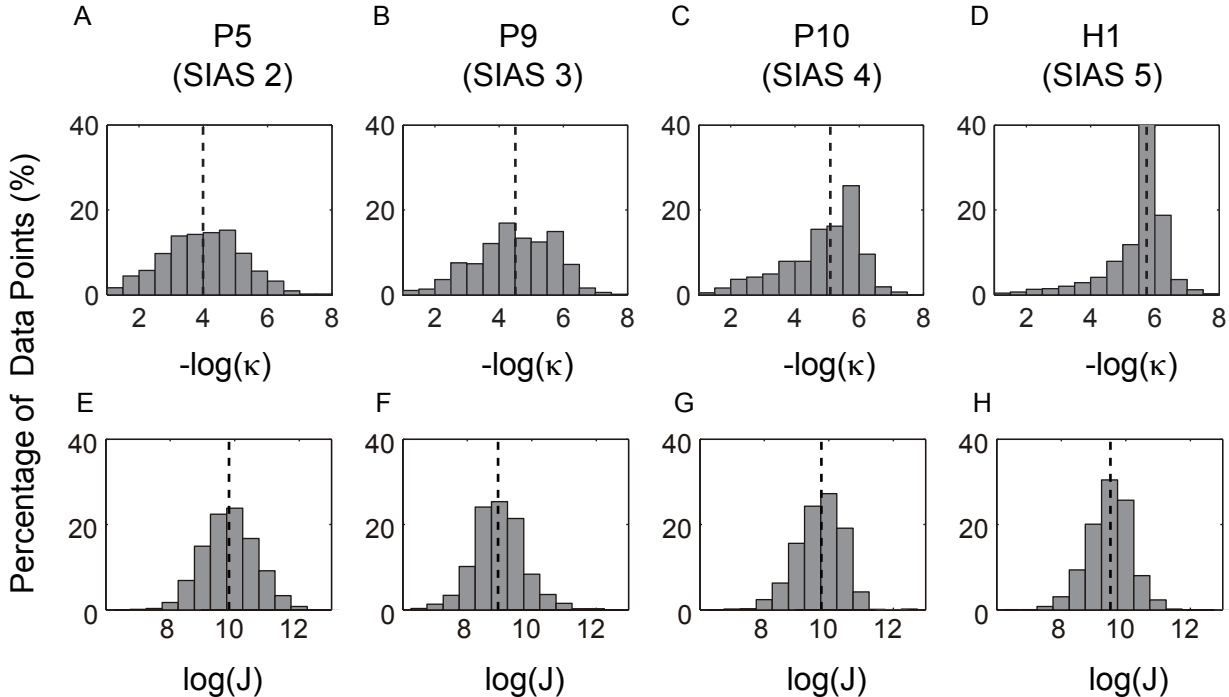

--- median

Supplement: MOESM2 [file 9605790]
